# Supplementary material for: The Promising Role of Probiotics in Managing the Altered Gut in Autism Spectrum Disorders
Source: MDPI journal article supplement (doi:10.3390/ijms21114159), 2020-06-10
Supplement: s1 [file s1]

Supplementary Materials for:

## The Promising Role of Probiotics in Managing the Altered Gut in Autism Spectrum Disorders

**Basma Abdellatif<sup>1</sup>, Clare McVeigh<sup>2</sup>, Ghizlane Bendriss<sup>3</sup> and Ali Chaari<sup>\*4</sup>**

<sup>1</sup> Premedical department, Weill Cornell Medicine, Qatar Foundation, Education City, P.O. Box 24144, Doha, Qatar.; bwa4001@qatar-med.cornell.edu

<sup>2</sup> Premedical department, Weill Cornell Medicine, Qatar Foundation, Education City, P.O. Box 24144, Doha, Qatar.; clm2021@qatar-med.cornell.edu

<sup>3</sup> Premedical department, Weill Cornell Medicine, Qatar Foundation, Education City, P.O. Box 24144, Doha, Qatar.; ghb2002@qatar-med.cornell.edu

<sup>4</sup> Premedical department, Weill Cornell Medicine, Qatar Foundation, Education City, P.O. Box 24144, Doha, Qatar.; alc2033@qatar-med.cornell.edu

\* Correspondence: alc2033@qatar-med.cornell.edu; Tel.: +974 33593586

**Table S1.** A summary of the altered gut flora in individuals with autism spectrum disorder (ASD).

| <i>Bacteria/Fungi</i>                    | Status in ASD cohorts<br>(compared to neurotypical cohorts) | Significance                                                                                           | Reference  |
|------------------------------------------|-------------------------------------------------------------|--------------------------------------------------------------------------------------------------------|------------|
| <i>Candida</i>                           | Higher                                                      | Secrete D- arabinitol<br>Affects carbohydrate, and mineral<br>absorption and Secretes toxin            | [109, 110] |
|                                          | Same                                                        |                                                                                                        | [101]      |
| <i>Lactobacillus</i>                     | Lower                                                       | Normally maintain intestines' tight<br>junctions.                                                      | [112]      |
|                                          | Higher                                                      |                                                                                                        | [103]      |
| <i>Prevotella</i>                        | Lower                                                       | Normally<br>degrades polysaccharides,<br>important for community structure<br>and vitamin B1 synthesis | [113]      |
| <i>Veillonellaceae</i>                   | Lower                                                       | It ferments lactate                                                                                    | [108]      |
|                                          | Higher                                                      | The study used an omnivores diet                                                                       | [118]      |
| <i>Clostridium</i>                       | Higher                                                      | Directly correlated to GI problems                                                                     | [103]      |
| <i>Desulfovibrio</i>                     | Higher                                                      | Secrete hydrogen sulfide                                                                               | [120]      |
| <i>Streptococcus<br/>and Coprococcus</i> | decreased                                                   |                                                                                                        | [106]      |

**Table S2.** Summary of major animal studies of probiotic interventions, their mechanism of action and their outcomes related to ASD.

| Name of Probiotic strains                                                                                                                     | Study type                      | Probiotic type and dose                                          | Duration of intervention | Mechanism of action                                                                                                                                                                                                                                                                                                                                                      | Outcomes                                                                                                                                                                                                                                                                                                                                                                                                 | Reference | year |
|-----------------------------------------------------------------------------------------------------------------------------------------------|---------------------------------|------------------------------------------------------------------|--------------------------|--------------------------------------------------------------------------------------------------------------------------------------------------------------------------------------------------------------------------------------------------------------------------------------------------------------------------------------------------------------------------|----------------------------------------------------------------------------------------------------------------------------------------------------------------------------------------------------------------------------------------------------------------------------------------------------------------------------------------------------------------------------------------------------------|-----------|------|
| Human-derived probiotic<br><i>Lactobacillus reuteri</i> strains (L. reuteri strains DSM17938, ATCC PTA4659, ATCC PTA 5289, and ATCC PTA 6475) | Newborn Sprague Dawley rat pups | 10 <sup>6</sup> CFU.g body wt <sup>-1</sup> .day <sup>-1</sup> . | 3 days                   | <ul style="list-style-type: none"> <li>- Decreased level of IL13 and IFN- level in intestine by <i>L.reuteri</i> strain DSM 17938</li> <li>- Decreased level in Lipopolysaccharides (LPS) induced TNF- and IL-1</li> <li>- Decreased of intestinal histological damage produced by LPS</li> <li>- Affect Th1 type and Th2 type cytokines in rat intestine</li> </ul>     | <ul style="list-style-type: none"> <li>- Human-derived probiotic <i>Lactobacillus reuteri</i> strains differentially reduce intestinal inflammation</li> <li>- <b>Recommendations:</b> It is appropriate to evaluate different strains of the same probiotic carefully, because they may affect the host differently</li> </ul>                                                                          | (165)     | 2010 |
| <i>Bacteroides fragilis</i> NCTC 9343                                                                                                         | Pregnant C57BL/6N mice          | 10 <sup>10</sup> CFU/ day                                        | 6 days                   | <ul style="list-style-type: none"> <li>- Increased in expression of CLDNs 8 and 15 and restoration of colonic IL-6 levels linked to the correction of the gut barrier integrity and permeability in MIA offspring but also correction in tight junction and cytokine expression</li> <li>- Specific commensal intestinal microbiota restored in MIA offspring</li> </ul> | <ul style="list-style-type: none"> <li>- It restored affected gut barrier evident by bringing serum metabolites, gut microbiota composition and behavioral symptoms back to normal in rat pups</li> <li>- Support a gut microbiome-brain connection in mouse model with ASD and the used probiotic may be considered as potential safe therapy for GI and particular behavior symptoms in ASD</li> </ul> | [98]      | 2013 |

|                                                                                            |                                                                                                                                                                                         |                                                               |         |                                                                                                                                                                                                                                                        |                                                                                                                                                                                                                                                                                                                                      |            |
|--------------------------------------------------------------------------------------------|-----------------------------------------------------------------------------------------------------------------------------------------------------------------------------------------|---------------------------------------------------------------|---------|--------------------------------------------------------------------------------------------------------------------------------------------------------------------------------------------------------------------------------------------------------|--------------------------------------------------------------------------------------------------------------------------------------------------------------------------------------------------------------------------------------------------------------------------------------------------------------------------------------|------------|
|                                                                                            |                                                                                                                                                                                         |                                                               |         | <ul style="list-style-type: none"> <li>- Corrects ASD related behavioral and neurological abnormalities</li> <li>- Corrects level of production of serum metabolites involved in key metabolism pathways</li> </ul>                                    |                                                                                                                                                                                                                                                                                                                                      |            |
| Mixture of <i>bifidobacteria</i> and <i>Lactobacilli</i> strains (ProtexinR)               | 50 young male golden Syrian hamsters weighing between 60 and 70 g (7 weeks of age) in which autistic like behaviors were induced by clindamycin and propionic acid (PPA) administration | $2 \times 10^8$ CFU/day                                       | 27 days | <ul style="list-style-type: none"> <li>- Changes in the gut microbiota</li> <li>- ameliorates glutamate excitotoxicity through increasing depleted GABA and <math>Mg^{2+}</math> and decreasing the excitatory neurotransmitter, glutamate.</li> </ul> | <ul style="list-style-type: none"> <li>- <i>Bifidobacteria</i> and <i>Lactobacilli</i> supplementation can be suggested as a strategy to ameliorate the glutamate excitotoxic effects of PPA and clindamycin.</li> </ul> <p>→ Probiotic treatment reduces the autistic-like excitation/inhibition imbalance in juvenile hamsters</p> | [167] 2018 |
| Probiotics Sachet Children's Formula (Biostime, Guangzhou, China): $1.9 \times 10^8$ cfu/g | C57BL/6J female mice                                                                                                                                                                    | $1.5675 \times 10^7$ cfu Bifidobacteria ( <i>B. bifidum</i> ) | 21 days | <ul style="list-style-type: none"> <li>- Increases in IL-6 and IL-17 levels in both maternal serum and fetal brain</li> <li>- Decreases in <math>\gamma</math>-aminobutyric acid levels in</li> </ul>                                                  | <p><i>Oral probiotics during pregnancy may be an effective means for decreasing the incidence of ASD in offspring</i></p>                                                                                                                                                                                                            | [166] 2019 |

|                                                                                                                                                                                                              |                                                                                                          |                                                                                                                                                                                                                                                                                                                                                                                                                                  |
|--------------------------------------------------------------------------------------------------------------------------------------------------------------------------------------------------------------|----------------------------------------------------------------------------------------------------------|----------------------------------------------------------------------------------------------------------------------------------------------------------------------------------------------------------------------------------------------------------------------------------------------------------------------------------------------------------------------------------------------------------------------------------|
| <p><i>Bifidobacteria</i> (<i>B. bifidum</i> and <i>B. infantis</i>) and <math>6.4 \times 10^9</math> cfu/g <i>Lactobacillus helveticus</i>, in addition to fructooligosaccharides (FOS) and maltodextrin</p> | <p>and <i>B. infantis</i>) and <math>5.28 \times 10^8</math> cfu <i>Lactobacillus helveticus</i>/24h</p> | <p>the prefrontal cortex of adult offspring</p> <ul style="list-style-type: none"> <li>- Prevents maternal immune activation (MIA)-induced repetitive behaviors in adult offspring</li> <li>- Prevents MIA-induced anxiety-like behavior in adult offspring</li> <li>- Prevents MIA-induced social deficits in adult offspring</li> <li>- Prevents MIA-induced decreases in GABA levels in the PFC of adult offspring</li> </ul> |
|--------------------------------------------------------------------------------------------------------------------------------------------------------------------------------------------------------------|----------------------------------------------------------------------------------------------------------|----------------------------------------------------------------------------------------------------------------------------------------------------------------------------------------------------------------------------------------------------------------------------------------------------------------------------------------------------------------------------------------------------------------------------------|

**Table S3.** Summary of major clinical studies of probiotic interventions, their mechanism of action and their outcomes related to ASD.

| Name of Probiotic strains                                                                                                                                                                                                            | Study type                                                                                                                    | Probiotic type and dose                                 | Duration of intervention | Outcomes                                                                                                                                                                                                                                                                                                     | Reference | year |
|--------------------------------------------------------------------------------------------------------------------------------------------------------------------------------------------------------------------------------------|-------------------------------------------------------------------------------------------------------------------------------|---------------------------------------------------------|--------------------------|--------------------------------------------------------------------------------------------------------------------------------------------------------------------------------------------------------------------------------------------------------------------------------------------------------------|-----------|------|
| General probiotics                                                                                                                                                                                                                   | Case report of 6-years-old boy with ASD                                                                                       | Not mentioned                                           | 8 weeks                  | - Improvement in school records and attitude against taking a variety of food<br>- His behavior and situation reversed back when the supplementation with probiotics was stopped                                                                                                                             | [168]     | 2000 |
| <i>Lactobacillus plantarum</i> WCFS1                                                                                                                                                                                                 | Double blind placebo crossover trial in United Kingdom with 22 children with ASD aged between 3 and 16 years old (91 % males) | $4.5 \times 10^{10}$ CFUs daily                         | 3 weeks                  | - Increased the number of <i>Lactobacilli/Enterococci</i> and decreases the <i>Clostridium coccoides</i> found in the stool samples of children with ASD as compared with placebo<br>- Improvement of the anti-social behaviors, anxiety and communication problems<br>- No major differences In GI symptoms | [119]     | 2010 |
| <i>L. acidophilus</i>                                                                                                                                                                                                                | Noncontrolled trial in Poland of 22 children with ASD aged between 4-10 years (90% males)                                     | $5 \times 10^9$ CFUs 2 times per day                    | 8 weeks                  | - Decrease in the level of D-arabiinitol and D-/L-arabinotol in the urine of children with autism<br>- Changes in ASD symptoms<br>- Improvement in the ability to concentrate and to carry orders                                                                                                            | [110]     | 2012 |
| Delpro® ( <i>Lactocillus acidophilus</i> , <i>Lactobacillus casei</i> , <i>Lactobacillus delbruecki</i> , <i>Bifidobacteria longum</i> , <i>Bifidobacteria bifdum</i> ) and Del Immune V® ( <i>Lactobacillus rhamnosus</i> V lysate) | Noncontrolled trial in USA of 33 children with ASD aged between 3-16 years                                                    | 10 billion CFUs total. 1 capsule, 3 times/d for 21 days | 21 days                  | - Improvement in Autism Treatment Evaluation Checklist score (ATEC) for 88% of children<br>- Improvement in GI symptoms, mainly reported a decrease in constipation and diarrhea,                                                                                                                            | [174]     | 2013 |
| "Children Dophilus": Blend of:<br>-3 strains of <i>Lactobacillus</i> (60%),                                                                                                                                                          | Noncontrolled trial in Slovakia of 29 Children: 10 ASD, 9 non-ASD siblings,                                                   | Not provided                                            | 3 times/day for 4 months | - Decreased levels of <i>Bacteroidetes/Firmicutes</i> ratio                                                                                                                                                                                                                                                  | [39]      | 2015 |

|                                                                                                                                                                                                                                                                                                                                                                                                                                                                |                                                                                                                                                |                               |                                        |                                                                                                                                                                                                                                                                                                                                                                              |       |      |
|----------------------------------------------------------------------------------------------------------------------------------------------------------------------------------------------------------------------------------------------------------------------------------------------------------------------------------------------------------------------------------------------------------------------------------------------------------------|------------------------------------------------------------------------------------------------------------------------------------------------|-------------------------------|----------------------------------------|------------------------------------------------------------------------------------------------------------------------------------------------------------------------------------------------------------------------------------------------------------------------------------------------------------------------------------------------------------------------------|-------|------|
| -2 strains of <i>Bifidumbacteria</i> (25%),<br>-1 strain of <i>Streptococcus</i> (15%)<br>(exact strain information not provided)                                                                                                                                                                                                                                                                                                                              | 10 non-ASD controls aged between 2–9 y; non-ASD siblings = 5–17 y; non-ASD controls = 2–11 y                                                   |                               |                                        | - Increase in the level of <i>Lactobacillus</i> in children with ASD as compared with controls<br>- Increased level of<br>- Increased in level of fecal TNF- $\alpha$ in children with ASD and their siblings compared with children without ASD, and there was a strong correlation between TNF- $\alpha$ concentrations and GI symptom                                     |       |      |
| <i>L. rhamnosus</i> GC (ATCC 53103)                                                                                                                                                                                                                                                                                                                                                                                                                            | Randomized trial, placebo controls in Finland of 75 infants for the 6 months of life and followed for 13 years starting at the age of 6 months | Not provided                  | The 6 first months of life             | - At the age of 13 years, 6 out of 35 children who took placebo were diagnosed with ASD or attention-deficit hyperactivity disorder (ADHD), but none in probiotic group.<br>- Probiotic supplementation early in life may reduce the risk of neuropsychiatric disorder development later in childhood by many mechanisms including the change in gut microbiota composition. | [170] | 1015 |
| VSL#3 (VSL Pharmaceuticals, Ft Lauderdale, FL, USA) :<br>3 $\times$ 10 <sup>11</sup> CFU/g of bifidobacteria ( <i>B. longum</i> , <i>B. infantis</i> and <i>B. breve</i> ), 8 $\times$ 10 <sup>10</sup> CFU /g of lactobacilli ( <i>L. acidophilus</i> , <i>L. casei</i> , <i>L. delbrueckii</i> subsp. <i>L. bulgaricus</i> and <i>L. plantarum</i> ) and 20 $\times$ 10 <sup>10</sup> CFU /g of <i>Streptococcus salivarius</i> subsp. <i>thermophilus</i> . | Case report of 12-years old boy with ASD and severe cognitive disability                                                                       | Not provided                  | 4 weeks followed by 4 months follow up | - Reduction in the severity of abdominal symptoms<br>- Reduction in neurobehavioral and gastrointestinal symptoms                                                                                                                                                                                                                                                            | [169] | 2016 |
| Vivomixx probiotic:<br><i>Streptococcus thermophilus</i> ,<br><i>Bifidobacterium breve</i> ,<br><i>Bifidobacterium longum</i> ,                                                                                                                                                                                                                                                                                                                                | Randomized, placebo-controlled trial of a group of 100 preschoolers with                                                                       | Dietary Supplement: Vivomixx® | 5 months                               | - Changes in severity level of ASD and GI symptomatology<br>- Changes in Behavioral Profiles<br>- Changes in Parental Stress                                                                                                                                                                                                                                                 | [59]  | 2016 |

|                                                                                                                                                                                                                  |                                                                                                                                                            |                                                                                                                                                                                                                                                                                                                                             |                                                                                                                                                                                  |                                                                                                                                                                                                                                                                                     |              |             |
|------------------------------------------------------------------------------------------------------------------------------------------------------------------------------------------------------------------|------------------------------------------------------------------------------------------------------------------------------------------------------------|---------------------------------------------------------------------------------------------------------------------------------------------------------------------------------------------------------------------------------------------------------------------------------------------------------------------------------------------|----------------------------------------------------------------------------------------------------------------------------------------------------------------------------------|-------------------------------------------------------------------------------------------------------------------------------------------------------------------------------------------------------------------------------------------------------------------------------------|--------------|-------------|
| <p><i>Bifidobacterium infantis</i>,<br/> <i>Lactobacillus acidophilus</i>,<br/> <i>Lactobacillus plantarum</i>,<br/> <i>Lactobacillus paracasei</i>,<br/> <i>Lactobacillus delbrueckii subsp. bulgaricus</i></p> | <p>ASD aged between 18-72 months in Italy.<br/> Blind randomized 1:1 to regular diet with probiotic or with placebo for 5 months</p>                       | <p>Two packets (900 billions of bacteria) per os (P.O.) daily x 1 month and one packet (450 billions of bacteria) P.O. daily x 5 months<br/> Dietary Supplement: PlaceboTwo packets (4,4 grams of maltose and silicon dioxide x 2) P.O. daily x 1 month and one packet (4,4 grams of maltose and silicon dioxide) P.O. daily x 5 months</p> | <p>- Changes in Electroencephalogram obtained parameters<br/> - Changes in levels of serum Lipopolysaccharide, leptin, serum resistin, TNF , IL-6, PAI-1, fecal calprotectin</p> | <p>[173]</p>                                                                                                                                                                                                                                                                        | <p>2018</p>  |             |
| <p>3 strains:<br/> <i>Lactobacillus acidophilus</i>,<br/> <i>Lactobacillus rhamnosus</i>,<br/> <i>Bifidobacteria longum</i></p>                                                                                  | <p>Prospective, open label noncontrolled trial in Egypt of 60 Children: 30 ASD and 30 age-/sex-matched controls (relatives) aged between 5-9 years old</p> | <p>5 g of powder/day (each gram contained 100x 10<sup>6</sup> CFUs of each strain)</p>                                                                                                                                                                                                                                                      | <p>1 time/day for 3 months</p>                                                                                                                                                   | <p>- Increase in <i>Bifidobacterial</i> and <i>Lactobacilli</i> levels<br/> - Improvement in the severity of autism assets by the decrease in ATEC score<br/> - Improvements in GI problems the probiotic has beneficial effect on both behavioral and GI manifestations of ASD</p> | <p>[173]</p> | <p>2018</p> |



Could be recommended for children with ASD as an adjuvant therapy

|                                                                                                                      |                                                                                                                                       |                                                                                                                        |                                                                                                                                                                    |                                                                                                                                                                                                                                                                                                                                             |              |             |
|----------------------------------------------------------------------------------------------------------------------|---------------------------------------------------------------------------------------------------------------------------------------|------------------------------------------------------------------------------------------------------------------------|--------------------------------------------------------------------------------------------------------------------------------------------------------------------|---------------------------------------------------------------------------------------------------------------------------------------------------------------------------------------------------------------------------------------------------------------------------------------------------------------------------------------------|--------------|-------------|
| <p><i>Lactobacillus rhamnosus</i> HN001<br/>Or<br/><i>Bifidobacteria animalis</i> subsp.<br/><i>lactis</i> HN019</p> | <p>Two centers, randomized, double blind, placebo-controlled study of 342 children followed from birth to 11 years in New Zealand</p> | <p>Not provided</p>                                                                                                    | <p>Mothers given probiotics from 35 weeks pregnant until 6 months. Children receive the treatment from birth to 2 years</p>                                        | <p>- HN001 and HN019 given in early life were not associated with neurocognitive outcomes at 11 years of age.<br/>- Recommendations: the study cannot exclude that other probiotics may have beneficial effect.</p>                                                                                                                         | <p>[59]</p>  | <p>2018</p> |
| <p><i>Bifidobacterium infantis</i> in combination with a prebiotic bovine colostrum product (BCP)</p>                | <p>A double-blind, crossover, randomized clinical trial with children ages 2–11 with ASD and GI comorbidities</p>                     | <p>A dose of 4 x 10<sup>9</sup> CFU twice daily of probiotics and 0.15 g/lb body weight per day for the prebiotics</p> | <p>12-week study included 5 weeks of probiotic-prebiotic supplementation, followed by a two-week washout period, and 5 weeks of prebiotic only supplementation</p> | <p>- Reduction in the frequency of certain GI symptoms<br/>- Reduced occurrence of particular aberrant behaviors<br/>- Reduction in IL-13 and TNF-<math>\alpha</math> production in some participants<br/>Although there is some improvements in ASD children's, further research into the efficacy of these treatments should be done.</p> | <p>[172]</p> | <p>2019</p> |

|                                                                                                                                                                                                                                                                                                                                                          |                                                                                                                                                  |                                                                                                                                                    |                 |                                                                                                                                                                                                                                                                                   |              |             |
|----------------------------------------------------------------------------------------------------------------------------------------------------------------------------------------------------------------------------------------------------------------------------------------------------------------------------------------------------------|--------------------------------------------------------------------------------------------------------------------------------------------------|----------------------------------------------------------------------------------------------------------------------------------------------------|-----------------|-----------------------------------------------------------------------------------------------------------------------------------------------------------------------------------------------------------------------------------------------------------------------------------|--------------|-------------|
| <p>VISBIOME probiotic:<br/> <i>Streptococcus thermophilus</i>,<br/> <i>Bifidobacterium breve</i>,<br/> <i>Bifidobacterium longum</i>,<br/> <i>Bifidobacterium infantis</i>,<br/> <i>Lactobacillus acidophilus</i>,<br/> <i>Lactobacillus plantarum</i>,<br/> <i>Lactobacillus paracasei</i>,<br/> <i>Lactobacillus delbrueckii subsp. bulgaricus</i></p> | <p>Randomized crossover trial with 13 children</p>                                                                                               | <p>Not mentioned</p>                                                                                                                               | <p>19 weeks</p> | <p>- The VISBIOME formulation was safe and suggested a health benefit in children with ASD and GI symptoms who retained <i>Lactobacillus</i></p>                                                                                                                                  | <p>[174]</p> | <p>2020</p> |
| <p><i>L. reuteri</i> (BioGaia)</p>                                                                                                                                                                                                                                                                                                                       | <p>Two staged, randomized, double blind placebo controlled, parallel group study of 60 patients with ASD aged between 3-25 years old in USA.</p> | <p>Dietary Supplement: oral probiotics 200 million cfu per day for 24 weeks<br/> Dietary Supplement: oral placebo 2 pills per day for 24 weeks</p> | <p>24 weeks</p> | <p>- Social communication and behavior test<br/> - Neuroinflammation and Oxytocin levels<br/> - structural and functional MRI<br/> - 16s metagenomic sequencing of the microbiome<br/> - Vital indices measurements<br/> - Assessment of GI function and gut microbiome/SCAFs</p> | <p>[171]</p> | <p>2020</p> |

**Table S4.** Summary of ongoing human studies of probiotic interventions to ASD.

| NCT No. | Trial name | Interventions | Probiotic type. dose and | Intervention Model | Outcomes measures | Estimated enrollment | Sponsors | Status |
|---------|------------|---------------|--------------------------|--------------------|-------------------|----------------------|----------|--------|
|---------|------------|---------------|--------------------------|--------------------|-------------------|----------------------|----------|--------|

|             |                                                                                                            | <b>duration of intervention</b>                                                          |                                                                                                                                                                                              |                                     |                                                                                                                                                                                                                                                                                                                                                                                                                                                                                                                                                                                                                                                                                                                     |                                               |                                        |            |  |
|-------------|------------------------------------------------------------------------------------------------------------|------------------------------------------------------------------------------------------|----------------------------------------------------------------------------------------------------------------------------------------------------------------------------------------------|-------------------------------------|---------------------------------------------------------------------------------------------------------------------------------------------------------------------------------------------------------------------------------------------------------------------------------------------------------------------------------------------------------------------------------------------------------------------------------------------------------------------------------------------------------------------------------------------------------------------------------------------------------------------------------------------------------------------------------------------------------------------|-----------------------------------------------|----------------------------------------|------------|--|
| NCT03514784 | Combination Probiotic: BB-12 With LGG (Different Doses) in Treating Children With Autism Spectrum Disorder | Drug: BB-12 with LGG (Higher Dose)<br>Drug: Placebo<br>Drug: BB-12 with LGG (Lower Dose) | Drug: BB-12 with LGG (Higher Dose: 10 billion CFUs)<br>Drug: Placebo Maltodextrin<br>Drug: BB-12 with LGG (Lower Dose; 1 billion CFUs)<br>Over 56-day period and a 28-day observation period | Blinded randomized controlled study | <ul style="list-style-type: none"> <li>- Effects of BB-12+LGG at different doses on GI symptoms</li> <li>- Effects of BB-12+LGG at different doses on gut inflammation (S1009A)</li> <li>- Effects of BB-12+LGG at different doses on gut inflammation (Fecal Calprotectin, plasma Zonulin and IL-8)</li> <li>- Using 16S rDNA analysis, this will determine microbial alpha and beta diversity and distribution of the major taxa before and after probiotic treatment</li> <li>- Effects of BB-12+LGG at different doses on metabolites to determine levels of metabolic markers which are reported to be abnormal in autism: fecal amino acids, ammonia, short chain fatty acids (SCFA), and phenols.</li> </ul> | 70 healthy children with confirmed ASD status | UTHealth Houston, Texas, United States | Recruiting |  |

|             |                                                                               |                                                             |                                                                                                                                                                                                                                                  |                                                             |                                                                                                                                                                                                                                                                                                                                                                                                                                                                                                        |                                                                                    |                                                                           |                       |
|-------------|-------------------------------------------------------------------------------|-------------------------------------------------------------|--------------------------------------------------------------------------------------------------------------------------------------------------------------------------------------------------------------------------------------------------|-------------------------------------------------------------|--------------------------------------------------------------------------------------------------------------------------------------------------------------------------------------------------------------------------------------------------------------------------------------------------------------------------------------------------------------------------------------------------------------------------------------------------------------------------------------------------------|------------------------------------------------------------------------------------|---------------------------------------------------------------------------|-----------------------|
| NCT02903030 | Efficacy of Vivomixx on Behavior and Gut Function in Autism Spectrum Disorder | Dietary Supplement: Vivomixx<br>Dietary Supplement: Placebo | Probiotic: multi strain probiotic Vivomixx containing 450 billion lyophilized bacterial cells per sachet belonging to 8 probiotic strains.<br>Placebo: 4.4 grams of maltose and silicon dioxide per sachet<br>Duration: 3 months supplementation | Randomized controlled cross-over design with 4-week washout | <ul style="list-style-type: none"> <li>- A change in the Autism Treatment Evaluation Checklist (ATEC) total score compared to baseline.</li> <li>- A change in the frequency of gastrointestinal symptoms compared to baseline, as measured by the Gastrointestinal History (GIH) questionnaire.</li> <li>- A change in the Aberrant Behavior Checklist (ABC) total score compared to baseline.</li> <li>- A change in the Autism Parenting Stress Index (APSI) score compared to baseline.</li> </ul> | 82 children with Autism Spectrum Disorders and co-morbid gastrointestinal symptoms | Ohio State University Wexner Medical Center Columbus, Ohio, United States | Recruiting            |
| NCT02903030 | Probiotics for Quality of Life in Autism Spectrum Disorders                   | Drug: BB-12 with LGG<br>Drug: Placebo                       | Drug: combination probiotic BB-12 with LGG orally (LGG dose: 10 <sup>9</sup> c.f.u.'s; BB-12: 10 <sup>9</sup> ) for a total of 56 doses<br>Pplacebo (maltodextrin) at 2:1 ratio.<br>Duration: 84 days                                            | Randomized                                                  | <ul style="list-style-type: none"> <li>- Children with ASD &amp; GI symptoms differ in microbiome composition and function from neurotypical children with GI symptoms</li> <li>- Visbiome Extra Strength, improves GI and pain symptoms, correlating with altered gut microbiome</li> </ul>                                                                                                                                                                                                           | 13                                                                                 | Ohio State University Wexner Medical Center Columbus, Ohio, United States | Completed Has Results |

|             |                                                                                                 |                                       |                                                                                                                                                                                                                                                                                                                                                                      |            |                                                                                                                                                                                                                                                                                                                                                                                                                                                                                  |                                                                   |                                                                                    |           |
|-------------|-------------------------------------------------------------------------------------------------|---------------------------------------|----------------------------------------------------------------------------------------------------------------------------------------------------------------------------------------------------------------------------------------------------------------------------------------------------------------------------------------------------------------------|------------|----------------------------------------------------------------------------------------------------------------------------------------------------------------------------------------------------------------------------------------------------------------------------------------------------------------------------------------------------------------------------------------------------------------------------------------------------------------------------------|-------------------------------------------------------------------|------------------------------------------------------------------------------------|-----------|
|             |                                                                                                 |                                       |                                                                                                                                                                                                                                                                                                                                                                      |            | composition and related metabolites                                                                                                                                                                                                                                                                                                                                                                                                                                              |                                                                   |                                                                                    |           |
|             |                                                                                                 |                                       |                                                                                                                                                                                                                                                                                                                                                                      |            | - Change in The Aberrant Behavior                                                                                                                                                                                                                                                                                                                                                                                                                                                |                                                                   |                                                                                    |           |
|             |                                                                                                 |                                       |                                                                                                                                                                                                                                                                                                                                                                      |            | - Change in Social Responsiveness Scale                                                                                                                                                                                                                                                                                                                                                                                                                                          |                                                                   |                                                                                    |           |
| NCT02674984 | Road to Discovery for Combination Probiotic BB-12 With LGG in Treating Autism Spectrum Disorder | Drug: BB-12 with LGG<br>Drug: Placebo | <p>Drug: Visbiome Extra Strength<br/>It is a mix of 8 strains of beneficial bacteria that should improve gut flora, improving GI function and hopefully anxiety.</p> <p>Drug: Maltose (placebo)<br/>Maltose with a trace amount of silicon dioxide<br/>Other Name: Maltose with silicon dioxide<br/>Duration: 8 weeks per condition with 3 weeks washout between</p> | Randomized | <p>- Effect of combination probiotic BB-12+LGG on adverse events assessed by case report form (survey) that are related to BB-12 with LGG (health-promoting bacteria) or placebo treatment.</p> <p>- Effect of combination probiotic BB-12+LGG on irritability and maladaptive behaviors with Aberrant Behavior Checklist (ABC)</p> <p>- Effect of combination probiotic BB-12+LGG on irritability and maladaptive behaviors measured with the Social Responsiveness Scale-2</p> | 29 healthy children with autism spectrum disorder aged 4-15 years | University of Texas Health Science Center at Houston Houston, Texas, United States | Completed |

|             |                                                                                                                                                  |                                                                                                    |                                                                                                                                                                                                                                                                                  |                                                                                           |                                                                                                                                                                                                                                                                                                                                                                                                                                                                              |                                                                  |                                                                                                           |            |
|-------------|--------------------------------------------------------------------------------------------------------------------------------------------------|----------------------------------------------------------------------------------------------------|----------------------------------------------------------------------------------------------------------------------------------------------------------------------------------------------------------------------------------------------------------------------------------|-------------------------------------------------------------------------------------------|------------------------------------------------------------------------------------------------------------------------------------------------------------------------------------------------------------------------------------------------------------------------------------------------------------------------------------------------------------------------------------------------------------------------------------------------------------------------------|------------------------------------------------------------------|-----------------------------------------------------------------------------------------------------------|------------|
| NCT04293783 | Randomized<br>Double-blind<br>Clinical Trial With<br><i>L.Reuteri</i><br>Supplementation in<br>Children With<br>Autism Spectrum<br>Disorder      | Dietary<br>Supplement:<br><i>L.Reuteri</i><br>Dietary<br>Supplement:<br>Placebo                    | Dietary<br>Supplement:<br><i>L.Reuteri</i><br>daily<br>supplementation<br>with two tablets<br>for six months<br>Other Name:<br>Gastrus<br>Dietary<br>Supplement:<br><i>L.Reuteri</i><br>daily<br>supplementation<br>with two tablets<br>for six months<br>Other Name:<br>Gastrus | Double-<br>blind<br>randomized,<br>parallel-<br>group,<br>placebo-<br>controlled<br>study | - Changes in GI and<br>ASD symptoms<br>- Changes in<br>Adaptive Functioning<br>- Changes in<br>Behavioral Profiles and<br>parental stress<br>Changes in Metabolomic<br>Profile such as<br>neurotransmitter<br>metabolism,<br>gastrointestinal alterations<br>or dysbiosis, and<br>mitochondrial dysfunction<br>- The effect<br>of probiotic administration<br>on the metabolome will be<br>investigated.<br>- Changes in<br>inflammatory profile<br>(zonulin, IL-17 profile) | 80 children<br>With Autism<br>Spectrum<br>Disorder               | University<br>of Bari<br>Bari, BA,<br>Italy<br>University<br>of Rome<br>Tor Vergata<br>Rome, RM,<br>Italy | Recruiting |
| NCT03982290 | Psychophysiological<br>Effects of<br><i>Lactobacillus</i><br><i>Plantarum</i> PS128 in<br>Preschool Children<br>With Autism<br>Spectrum Disorder | Probiotic,<br>Lactobacillus<br><i>plantarum</i> PS128<br>Placebo:<br>microcrystalline<br>cellulose | Probiotic,<br><i>Lactobacillus</i><br><i>plantarum</i> PS128<br>PS128 capsules,<br>2 capsules per<br>day<br>Other Name:<br>PS128<br>Placebo,<br>microcrystalline<br>cellulose                                                                                                    | Double-<br>blinded,<br>randomized,<br>placebo-<br>controlled                              | - Changes from<br>baseline of anxiety<br>subscale in Children's<br>Behavior Checklist<br>(CBCL)/Achenbach<br>System of Empirically<br>Based Assessment<br>(ASEBA) at week 8 and<br>week 16<br>- Changes from<br>hyperactivity subscale of                                                                                                                                                                                                                                    | 250 Preschool<br>Children with<br>Autism<br>Spectrum<br>Disorder | Department<br>of Pediatric<br>Neurology,<br>MacKay<br>Children's<br>Hospital<br>Taipei,<br>Taiwan         | Recruiting |

|             |                                                                                                                        |                                      |                                                                                                                                                                                                                                                                 |                                            |                                                                                                                                                                                                                                                                                   |                                                                                                                                |                                                                                        |            |
|-------------|------------------------------------------------------------------------------------------------------------------------|--------------------------------------|-----------------------------------------------------------------------------------------------------------------------------------------------------------------------------------------------------------------------------------------------------------------|--------------------------------------------|-----------------------------------------------------------------------------------------------------------------------------------------------------------------------------------------------------------------------------------------------------------------------------------|--------------------------------------------------------------------------------------------------------------------------------|----------------------------------------------------------------------------------------|------------|
|             |                                                                                                                        |                                      | Placebo capsules, 2 capsules per day<br>Duration: 16 weeks                                                                                                                                                                                                      |                                            | Attention-Deficit/Hyperactivity Disorder Test (ADHDT) at week 8 and week 16<br>- Gut and oral microbiota analysis<br>- Changes in constipation, diarrhea, stool consistency, stool smell, flatulence, and abdominal pain<br>- Changes in Communicative and interactive assessment |                                                                                                                                |                                                                                        |            |
| NCT03858816 | Efficacy of Multiple Strain Probiotics Reduces the Neurobehavioral Disorder in Premature Very Low Birth Weight Infants | Mixture probiotics<br>Other: Placebo | The mixture probiotics capsule: contain $1 \times 10^9$ CFU/1 capsule of mixture probiotics, taking 1 probiotic capsule for up to 4 months after birth.<br>The placebo contains the same excipient ingredients but without the live bacteria: 1 placebo capsule | Double blind, randomized, controlled trial | - Incidence rate of death or ADHD and ASD<br>- Incidence rate of NEC $\geq$ stage 2, sepsis, severe (grade 3-4) IVH, BPD, liver function and adverse effects or intolerance and neurodevelopment impairment.                                                                      | 320 Preterm infants $\geq$ 23 weeks and $\leq$ 32 weeks gestational age and birth weight below 1500 gm and who survive to NICU | Department of Pediatrics, Children Hospital, China Medical University Taichung, Taiwan | Recruiting |

|             |                                                                                                         |                                                                  |                                                                                                                                                                                                                                                                                                                                                                                                                                                       |            |                                                                                                                                                                                                            |                         |                                                               |                       |
|-------------|---------------------------------------------------------------------------------------------------------|------------------------------------------------------------------|-------------------------------------------------------------------------------------------------------------------------------------------------------------------------------------------------------------------------------------------------------------------------------------------------------------------------------------------------------------------------------------------------------------------------------------------------------|------------|------------------------------------------------------------------------------------------------------------------------------------------------------------------------------------------------------------|-------------------------|---------------------------------------------------------------|-----------------------|
|             |                                                                                                         |                                                                  | for up to 4 months after birth                                                                                                                                                                                                                                                                                                                                                                                                                        |            |                                                                                                                                                                                                            |                         |                                                               |                       |
| NCT02086110 | Effect of Milk Oligosaccharides and Bifidobacteria on the Intestinal Microbiota of Children with Autism | Milk Oligosaccharides (prebiotic) and Bifidobacteria (probiotic) | oligosaccharides in two divided doses per day orally<br>Prebiotic: bovine colostrum, bovine oligosaccharides administered orally twice per day for a daily total of 0.3 g per pound of body weight for the first five weeks, followed by a two-week break with no treatment, and then will receive the synbiotic<br>Probiotic: <i>Bifidobacterium infantis</i> SC268 (10 billion CFU) twice a day plus 0.3 g per pound body weight of bovine milk for | Randomized | - Stool Microbiota Composition Change During Prebiotic Only Treatment<br>- Stool Microbiota Composition Change During Synbiotic Treatment<br>- Serum Immune Profile Change During Prebiotic Only Treatment | 11 children with Autism | UC Davis MIND Institute Sacramento, California, United States | Completed Has Results |



---

the next five  
weeks  
Duration: 8  
weeks

---
